# Supplementary material for: A general method for making bicyclic compounds with nitrogen at a bridgehead—application to the halichlorine spiro subunit
Source: Royal Society of Chemistry journal article supplement (doi:10.1039/b413481h), 2004-12-23
Supplement: b413481h.pdf [file b413481h.pdf]

# Supplementary Material (ESI) for Chemical Communications  
# This journal is © The Royal Society of Chemistry 2005  
**Electronic Supporting Information**

**A general method for making bicyclic compounds with nitrogen at a  
bridgehead – application to the halichlorine spiro subunit**

---

Derrick L. J. Clive,\* Maolin Yu, and Zhiyong Li

*Chemistry Department, University of Alberta, Edmonton, Alberta,  
Canada T6G 2G2. FAX: 780-492-8231; Tel. 780-492-3251; E-mail:  
derrick.clive@ualberta.ca*

**Spectral data for final products.** The symbols s, d, t, q in the  
<sup>13</sup>C NMR spectra refer to 0, 1, 2, or 3 attached hydrogens.

Compound **3**: FTIR (CH<sub>2</sub>Cl<sub>2</sub> cast) 1732, 1714, 1672 cm<sup>-1</sup>; <sup>1</sup>H NMR  
(CDCl<sub>3</sub>, 500 MHz) δ 0.91 (d, *J* = 6.3 Hz, 3 H), 1.07–1.15 (m, 1 H),  
1.35–1.57 (m, 7 H), 1.64–1.79 (m, 3 H), 1.86–1.91 (m, 1 H), 1.97–  
2.17 (m, 4 H), 2.20–2.26 (m, 1 H), 2.29–2.35 (m, 1 H), 2.96–3.00  
(m, 1 H), 3.28–3.32 (m, 1 H), 3.44 (d, *J* = 16.0 Hz, 1 H), 3.59  
(s, 3 H), 3.72 (s, 3 H), 6.81–6.83 (m, 1 H); <sup>13</sup>C NMR (CDCl<sub>3</sub>, 125  
MHz) δ 20.1 (d), 21.7 (t), 23.6 (t), 29.1 (t), 31.6 (q), 32.61  
(t), 32.63 (t), 36.1 (t), 41.1 (t), 47.6 (t), 51.1 (d), 51.5 (q),  
52.9 (d), 57.1 (q), 67.2 (s), 129.0 (s), 136.6 (d), 166.5 (s),  
174.3 (s); exact mass *m/z* calcd for C<sub>20</sub>H<sub>32</sub>NO<sub>4</sub> (M + H) 350.233134,  
found 350.233264.

Compound **21**: FTIR (CH<sub>2</sub>Cl<sub>2</sub> cast) 1716, 1650 cm<sup>-1</sup>; [α]<sub>D</sub><sup>22</sup> + 195.9  
(c 1.1, CH<sub>2</sub>Cl<sub>2</sub>); <sup>1</sup>H NMR (CDCl<sub>3</sub>, 400 MHz) δ 1.38–1.47 (m, 1 H),  
1.70–1.92 (m, 2 H), 1.95–2.03 (m, 1 H), 2.06–2.15 (m, 2 H), 2.19  
(ABq, •*v*<sub>AB</sub> = 18.0 Hz, *J* = 9.2 Hz, 1 H), 2.38–2.47 (m, 1 H), 2.82–  
2.87 (m, 1 H), 3.21 (dt, *J* = 2.4, 8.8 Hz, 1 H), 3.71 (s, 3 H),  
3.78–3.83 (m, 1 H), 6.97–7.00 (m, 1 H); <sup>13</sup>C NMR (CDCl<sub>3</sub>, 100 MHz)

$\delta$  21.4 (t), 30.4 (t), 32.8 (t), 51.5 (t), 51.6 (q), 54.1 (t), 58.7 (d), 129.4 (s), 138.3 (d), 166.3 (s); exact mass  $m/z$  calcd for  $C_{10}H_{15}NO_2$  181.11028, found 181.11019.

Compound **26**: FTIR ( $CH_2Cl_2$  cast) 1713, 1661  $cm^{-1}$ ;  $^1H$  NMR ( $CDCl_3$ , 400 MHz)  $\delta$  1.17–1.35 (m, 2 H), 1.56–1.80 (m, 4 H), 2.00–2.16 (m, 3 H), 2.21–2.29 (m, 1 H), 2.76–2.82 (m, 1 H), 3.02 (d,  $J$  = 11.5 Hz, 1 H), 3.59 (d,  $J$  = 16.6 Hz, 1 H), 3.71 (s, 3 H), 6.91–6.93 (m, 1 H);  $^{13}C$  NMR ( $CDCl_3$ , 100 MHz)  $\delta$  24.2 (t), 25.8 (t), 33.2 (t), 34.0 (t), 51.5 (q), 53.4 (t), 55.9 (t), 56.4 (d), 128.1 (s), 137.1 (d), 166.1 (s); exact mass  $m/z$  calcd for  $C_{11}H_{17}NO_2$  195.12593, found 195.12585.

Compound **32**: FTIR ( $CH_2Cl_2$  cast) 1716, 1660  $cm^{-1}$ ;  $^1H$  NMR ( $CDCl_3$ , 300 MHz)  $\delta$  1.21–1.80 (m, 8 H), 2.02–2.38 (m, 2 H), 2.38–2.50 (m, 1 H), 2.68–2.91 (m, 2 H), 3.20 (d,  $J$  = 16.5 Hz, 1 H), 3.57 (d,  $J$  = 16.5 Hz, 1 H) 3.72 (s, 3 H), 6.91–6.99 (m, 1 H);  $^{13}C$  NMR ( $CDCl_3$ , 100 MHz)  $\delta$  24.4 (t), 27.4 (t), 28.7 (t), 33.0 (t), 35.1 (t), 51.5 (d), 54.3 (t), 54.8 (t), 59.0 (q), 129.5 (s), 138.6 (d), 166.2 (s); exact mass  $m/z$  calcd for  $C_{12}H_{19}NO_2$  209.14159, found 209.14128.

Compound **38**: FTIR ( $CH_2Cl_2$  cast) 1715, 1664  $cm^{-1}$ ;  $^1H$  NMR ( $CDCl_3$ , 300 MHz)  $\delta$  1.32–1.84 (m, 10 H), 1.96–2.30 (m, 2 H), 2.61–2.80 (m, 2 H), 2.80–2.96 (m, 1 H), 3.32 (d,  $J$  = 17.0 Hz, 1 H), 3.49 (d,  $J$  = 17.0 Hz, 1 H) 3.70 (s, 3 H), 6.94–6.98 (m, 1 H);  $^{13}C$  NMR ( $CDCl_3$ , 100 MHz)  $\delta$  26.0 (t), 26.2 (t), 26.6 (t), 27.6 (t), 31.1 (t), 33.1 (t), 50.0 (t), 51.4 (d), 52.3 (t), 56.2 (q), 129.5 (s), 138.6 (d), 166.5 (s); exact mass  $m/z$  calcd for  $C_{13}H_{21}NO_2$  223.15723, found 223.15691.
